# Supplementary material
Source: MDPI journal article supplement (https://www.mdpi.com/2039-4403/14/1/35)
Supplement: s1 [file s1]

| NO | search                                 | Results<br>retrived |
|----|----------------------------------------|---------------------|
| 1  | Peripherally Inserted Central Catheter | 3750                |
| 2  | PICC                                   | 2013                |
| 3  | #1 OR #2                               | 4052                |
| 4  | tunnel                                 | 71459               |
| 5  | subcutaneous tunneling                 | 1748                |
| 6  | #4 OR #5                               | 71857               |
| 7  | #3 AND #6                              | 564                 |
| 8  | #7 AND randomized controlled trial     | 236                 |
